# Supplementary material for: Pretreatment Serum Uric Acid as an Efficient Predictor of Prognosis in Men with Laryngeal Squamous Cell Cancer: A Retrospective Cohort Study
Source: PubMed Central journal article supplement (PMC6501142; doi:10.1155/2019/1821969), 2019-04-16
Supplement: 1821969.f1.pdf [file 1821969.f1.pdf]

**Pre-treatment serum uric acid as an efficient predictor of prognosis in men with laryngeal squamous cell cancer: a retrospective cohort study**

Chiyao Hsueh<sup>1,2</sup>, Mingxi Shao<sup>3</sup>, Wenjun Cao<sup>3</sup>, Shengjie Li<sup>3\*</sup>, Liang Zhou<sup>1, 2\*</sup>

1. Department of Otolaryngology, Eye & ENT Hospital, Shanghai Medical College, Fudan University, Shanghai, China.
2. Shanghai Key Clinical Disciplines of Otorhinolaryngology, Shanghai Medical College, Fudan University, Shanghai, China.
3. Department of Clinical Laboratory, Eye & ENT Hospital, Shanghai Medical College, Fudan University, Shanghai, China

Table S1. Comparison of UA, UA/Cr ratio, and Cr between LSCC group and control group

|                          | LSCC group  | Control group | t value | P value     |
|--------------------------|-------------|---------------|---------|-------------|
| Age (years)              | 60.66±9.81  | 60.66±9.81    | 0.000   | 1.000       |
| Gender (male)            | 814         | 814           |         |             |
| BMI (kg/m <sup>2</sup> ) | 22.94±3.22  | 22.86±3.10    | 0.431   | 0.667       |
| UA (mmol/l)              | 0.330±0.075 | 0.356±0.078   | 6.850   | <0.001      |
| Cr (umol/l)              | 83.80±19.37 | 79.08±18.10   | 5.083   | <0.001      |
| UA/Cr ratio              | 4.04±1.04   | 4.62±1.12     | 10.847  | <0.001      |
| Logistic regression      | OR          | P value       |         | 95%CI       |
| Cr                       | 1.003       | 0.664         |         | 0.989-1.017 |
| UA                       | 0.671       | 0.002         |         | 0.018-2.165 |
| UA/Cr ratio              | 0.584       | <0.001        |         | 0.439-0.778 |

Data are expressed as mean±standard deviation (SD). Independent student's t-test and Logistic regression analyze was used. UA: uric acid. Cr: creatinine, BMI: body mass index.

Table S2. Comparison of demographics and clinical characteristic in patients with LSCC, stratified according to UA and UA/Cr ratio

|                         | UA     |        |        | UA/Cr ratio |             |        |
|-------------------------|--------|--------|--------|-------------|-------------|--------|
|                         | UA     | UA     | P      | UA/Cr       | UA/Cr       | P      |
|                         | >0.315 | ≤0.315 |        | ratio >3.98 | ratio ≤3.98 |        |
| TNM stage               |        |        |        |             |             |        |
| I (n=195)               | 104    | 91     |        | 87          | 108         |        |
| II (n=302)              | 183    | 119    |        | 156         | 146         |        |
| III(n=216)              | 121    | 95     |        | 52          | 164         |        |
| IV(n=101)               | 33     | 68     | <0.001 | 37          | 64          | <0.001 |
| T stage                 |        |        |        |             |             |        |
| T <sub>1</sub> (n=195)  | 104    | 91     |        | 87          | 108         |        |
| T <sub>2</sub> (n=328)  | 199    | 129    |        | 168         | 160         |        |
| T <sub>3</sub> (n=239)  | 114    | 115    |        | 113         | 126         |        |
| T <sub>4</sub> (n =52)  | 14     | 38     | <0.001 | 14          | 38          | 0.011  |
| N stage                 |        |        |        |             |             |        |
| N <sub>0</sub> (n=722)  | 453    | 269    |        | 341         | 381         |        |
| N <sub>1</sub> (n=31)   | 16     | 15     |        | 13          | 18          |        |
| N <sub>2</sub> (n=52)   | 22     | 30     |        | 25          | 27          |        |
| N <sub>3</sub> (n=9)    | 4      | 5      | 0.012  | 3           | 6           | 0.801  |
| Age                     |        |        |        |             |             |        |
| <60 (n=399)             | 243    | 156    |        | 188         | 211         |        |
| ≥60(n=415)              | 198    | 217    | 0.087  | 194         | 221         | 0.916  |
| BMI                     |        |        |        |             |             |        |
| <22.94 (413)            | 216    | 197    |        | 189         | 224         |        |
| ≥22.94 (401)            | 225    | 176    | 0.275  | 193         | 208         | 0.499  |
| Hypertension            |        |        |        |             |             |        |
| No (n=585)              | 335    | 253    |        | 268         | 317         |        |
| Yes (n=229)             | 109    | 120    | 0.016  | 114         | 115         | 0.308  |
| Smoking history         |        |        |        |             |             |        |
| No (n=244)              | 148    | 96     |        | 112         | 132         |        |
| Yes (n=570)             | 293    | 277    | 0.015  | 270         | 300         | 0.701  |
| Drinking history        |        |        |        |             |             |        |
| No (n=505)              | 290    | 215    |        | 227         | 278         |        |
| Yes (n=309)             | 151    | 158    | 0.017  | 155         | 154         | 0.148  |
| Tumor subsite           |        |        |        |             |             |        |
| Supraglottic<br>(n=179) | 89     | 90     |        | 85          | 94          |        |
| Glottis(n=624)          | 348    | 276    |        | 297         | 327         |        |
| Subglottic(n=11)        | 4      | 7      | 0.176  | 3           | 8           | 0.408  |

UA: uric acid. UA/Cr ratio: uric acid/creatinine, BMI: body mass index.

Table S3. The number of subjects in different group, according to UA and UA/Cr ratio

|                   | I<br>stage | II<br>stage | III<br>stage | IV<br>stage | LSCC<br>group | Control<br>group | P value                                   |
|-------------------|------------|-------------|--------------|-------------|---------------|------------------|-------------------------------------------|
| UA                |            |             |              |             |               |                  |                                           |
| UA >0.315         | 104        | 183         | 121          | 33          | 441           | 519              |                                           |
| UA ≤0.315         | 91         | 119         | 95           | 68          | 373           | 206              | <0.05 <sup>a</sup> , 0.006 <sup>b</sup>   |
| UA/Cr ratio       |            |             |              |             |               |                  |                                           |
| UA/Cr ratio ≤3.98 | 108        | 146         | 164          | 64          | 432           | 202              |                                           |
| UA/Cr ratio >3.98 | 87         | 156         | 52           | 37          | 382           | 523              | <0.001 <sup>a</sup> , <0.001 <sup>b</sup> |

Chi-square test was used.

aP<0.05 for the difference between LSCC group and Control group.

bP-treuder <0.05 for the treuder among I stage, II stage, III stage, IV stage.
